# Supplementary material for: Artificial Intelligence for Clinical Decision Support in Acute Ischemic Stroke Care: A Systematic Review
Source: Research Square preprint supplement (doi:10.21203/rs.3.rs-1706474/v1), 2022-06-01
Supplement: Supplementary file 1 [file a956550dbde0570262389308.docx]

# Artificial Intelligence for Clinical Decision Support in Acute Ischemic Stroke Care: A Systematic Review

# **Supplementa**ry Material

### 1. Extraction Form

#### date: "2021-03-26"

#### Extraction form details

Artificial intelligence for clinical decision support in acute ischemic stroke care: A Systematic Review version 1.4

##### Extraction form elements

### **Include or exclude**

Variable type: Categorical (single selection only)

Database column name: include

Extractors were prompted to select one of the following mutually exclusive options.

| Displayed option name | Database value |
| --- | --- |
| Exclude | exclude |
| Review | review |
| Automated stroke score (e.g. ASPECTS, collaterals and mismatch) | automated |
| Segmentation | segmentation |
| Full extraction | full |

Extractor prompt:

| Leave the remainder of the extraction form blank if "full extraction" is not chosen |
| --- |

### **Reason for exclusion**

Variable type: Categorical (single selection only)

Database column name: reason_exclusion

Extractors were prompted to select one of the following mutually exclusive options.

| Displayed option name | Database value |
| --- | --- |
| no full text (can't find it) | not_found |
| no full text (poster) | poster |
| not AI | not_AI |
| not decision aid | not_DA |
| not humans | not_human |

### **Other reason for exclusion?**

Variable type: Open text field

Database column name: exclusion_rationale_other

###

### **AI technique for automated stroke score**

Variable type: Open text field

Database column name: ai_technique_auto

###

### **Stroke score for segmentation**

Variable type: Open text field

Database column name: stroke_score_seg

###

### **Outcome endpoint details**

Variable type: Categorical (multiple selection allowed)

Extractors were prompted to select one or more of the following options.

The options selected by extractors would be exported with a 1 in the corresponding database column.

| Displayed option name | Database column |
| --- | --- |
| 30-day dichotomized mrs | outcome_endpoint_30_day |
| 90-day dichotomized mrs | outcome_endpoint_90_day |
| Successful recanalization overall | outcome_endpoint_successful_recanalization |
| First-time successful recanalization | outcome_endpoint_first_time_successful_recanalization |
| Final infarction mapping | outcome_endpoint_final_infarction |
| mTICI score | outcome_endpoint_mTICI |
| Successful intravenous thrombolysis | outcome_endpoint_successful_iv_thrombolysis |
| onset time dichotomized (4.5h) | outcome_endpoint_onset_time |
| intracranial hemorrhage prediction | outcome_endpoint_sICH |
| brain edema prediction | outcome_endpoint_edema |
| Other | outcome_endpoint_other |

### **Outcome endpoint other**

Variable type: Open text field

Database column name: outcome_other

###

### **Patient subgroup details**

Variable type: Categorical (multiple selection allowed)

Extractors were prompted to select one or more of the following options.

The options selected by extractors would be exported with a 1 in the corresponding database column.

| Displayed option name | Database column |
| --- | --- |
| A. cerebri media infarction | patient_subgroup_a_cerebri |
| Wake-up stroke | patient_subgroup_wake_up |
| Large vessel occlusion stroke patients (incl. patients eligible for thrombectomy) | patient_subgroup_large_vessel |
| Elderly patients | patient_subgroup_elderly |
| First time stroke patients | patient_subgroup_first_time |
| tPA patients | patient_subgroup_tPA |
| Other | patient_subgroup_other |

### **Other**

Variable type: Open text field

Database column name: other_group

###

### **Sample size (patients)**

Variable type: Open text field

Database column name: sample_size_pts

Extractor prompt:

| Number of patients |
| --- |

### **Patient demographics**

Variable type: Categorical (multiple selection allowed)

Extractors were prompted to select one or more of the following options.

The options selected by extractors would be exported with a 1 in the corresponding database column.

| Displayed option name | Database column |
| --- | --- |
| Age | patient_demographics_age |
| Sex | patient_demographics_sex |
| Race | patient_demographics_race |
| Ethnicity | patient_demographics_ethnicity |
| Socioeconomic status | patient_demographics_ses |
| None | patient_demographics_none |

### **Best AI technique**

Variable type: Categorical (single selection only)

Database column name: ai_technique

Extractors were prompted to select one of the following mutually exclusive options.

| Displayed option name | Database value |
| --- | --- |
| Tree boosting | tree_boosting |
| Multilayer perceptions | multilayer_perceptions |
| CNN | cnn |
| Logistic regression | logistic_regression |
| Random forest | random_forest |
| XGBoost | xgboost |
| Support vector machine | svm |
| Other (specify below) | other |

Extractor prompt:

| Note: catboosting is the same as tree boosting |
| --- |

### **Other AI technique**

Variable type: Open text field

Database column name: other_ai_technique

###

### **Input data for the best model**

Variable type: Categorical (multiple selection allowed)

Extractors were prompted to select one or more of the following options.

The options selected by extractors would be exported with a 1 in the corresponding database column.

| Displayed option name | Database column |
| --- | --- |
| MRI | multi_select_mri |
| CT | multi_select_ct |
| Clinical | multi_select_clinical |
| Unknown Imaging | multi_select_unknown_imaging |

### **Specify details of input data**

Variable type: Text area

Database column name: input_data_details

###

### **Input data used by model**

Variable type: Open text field

Database column name: model_data

Extractor prompt:

| Specify which of the previously entered input data can be used by the "best" model as identified above |
| --- |

### **Number of data points**

Variable type: Open text field

Database column name: sample_size_data_points

###

### **Training set percent**

Variable type: Open text field

Database column name: training_percent

Extractor prompt:

| Enter "ns" if not stated; number of data points, not number of patients |
| --- |

### **Training set (n)**

Variable type: Open text field

Database column name: training_n

Extractor prompt:

| Enter "ns" if not stated |
| --- |

### **Testing set percent**

Variable type: Open text field

Database column name: testing_percent

Extractor prompt:

| Enter "ns" if not stated; number of data points, not number of patients |
| --- |

### **Testing n**

Variable type: Open text field

Database column name: testing_n

Extractor prompt:

| Enter "ns" if not stated; number of data points, not number of patients |
| --- |

### **Distribution reporting**

Variable type: Categorical (multiple selection allowed)

Extractors were prompted to select one or more of the following options.

The options selected by extractors would be exported with a 1 in the corresponding database column.

| Displayed option name | Database column |
| --- | --- |
| Ratio/percentage reported | distribution_reporting_ratio |
| Absolute numbers reported | distribution_reporting_n |
| Distribution not reported | distribution_reporting_ns |

### **Hyper-parameter optimization**

Variable type: Categorical (single selection only)

Database column name: hyper_parameter

Extractors were prompted to select one of the following mutually exclusive options.

| Displayed option name | Database value |
| --- | --- |
| Grid search | grid |
| Random search | random |
| Other (specify below) | other |
| None | none |

### **Other hyper-parameter optimization**

Variable type: Open text field

Database column name: other_hyper_parameter

###

### **Validation method**

Variable type: Categorical (single selection only)

Database column name: validation_method

Extractors were prompted to select one of the following mutually exclusive options.

| Displayed option name | Database value |
| --- | --- |
| Cross-validation | cross_validation |
| Nested cross-validation | nested_cross_validation |
| Other (specify below) | other |
| None | none |

### **Other validation method**

Variable type: Open text field

Database column name: other_validation_method

###

### **Output endpoint**

Variable type: Categorical (multiple selection allowed)

Extractors were prompted to select one or more of the following options.

The options selected by extractors would be exported with a 1 in the corresponding database column.

| Displayed option name | Database column |
| --- | --- |
| Classification | output_endpoint_classification |
| Prediction | output_endpoint_prediction |

Extractor prompt:

| Classification: relevant to the present  Prediction: relevant to the future |
| --- |

### **Output measurement**

Variable type: Categorical (multiple selection allowed)

Extractors were prompted to select one or more of the following options.

The options selected by extractors would be exported with a 1 in the corresponding database column.

| Displayed option name | Database column |
| --- | --- |
| AUC | output_measurement_auc |
| Sensitivity | output_measurement_sensitivity |
| Specificity | output_measurement_specificity |
| Dice | output_measurement_dice |
| None of the above specified | output_measurement_none |

### **Results**

Table data

Extractors were prompted to add rows to a table of open text fields with the following column headings.

| Displayed column name | Database column name |
| --- | --- |
| Measurement | measurement |
| Result | result |

Extractor prompt:

| Include all measures identified under "output measurements" |
| --- |

### **Who is the comparator?**

Variable type: Categorical (multiple selection allowed)

Extractors were prompted to select one or more of the following options.

The options selected by extractors would be exported with a 1 in the corresponding database column.

| Displayed option name | Database column |
| --- | --- |
| Human | clinical_comp_human |
| Automated | clinical_comp_auto |
| None | clinical_comp_none |

### **In what way were they compared?**

Variable type: Categorical (multiple selection allowed)

Extractors were prompted to select one or more of the following options.

The options selected by extractors would be exported with a 1 in the corresponding database column.

| Displayed option name | Database column |
| --- | --- |
| ASPECTS | score_aspects |
| DWI-FLAIR mismatch | score_dwi_flair |
| Collateral | score_collateral |

### **Clinical comparator results**

Table data

Extractors were prompted to add rows to a table of open text fields with the following column headings.

| Displayed column name | Database column name |
| --- | --- |
| Measurement | measurement |
| Result | result |

Extractor prompt:

| Only the variables that we identified in "output measurement" |
| --- |

### 2. Automated Stroke Scoring Methods

| **Citation** | **Category** | **Model/Software used** |
| --- | --- | --- |
| [1] | ASPECTS | k-means clustering |
| [2] | ASPECTS | e-ASPECTS |
| [3] | ASPECTS | e-ASPECTS |
| [4] | ASPECTS | e-ASPECTS, Frontier_ASPECTS |
| [5] | ASPECTS | e-ASPECTS |
| [6] | ASPECTS | Frontier_ASPECTS |
| [7] | ASPECTS | e-ASPECTS |
| [8] | ASPECTS | Unknown |
| [9] | ASPECTS | RAPID ASPECTS |
| [10] | ASPECTS | e-ASPECTS, RAPID ASPECTS |
| [11] | Collaterals | e-CTA |
| [12] | ASPECTS | e-ASPECTS |
| [13] | ASPECTS | recurrent residual convolutional neural network |
| [14] | Collaterals | SVM |
| [15] | ASPECTS | e-DWI ASPECTS |
| [17] | ASPECTS | s-ASPECTS |
| [18] | ASPECTS | e-ASPECTS |
| [19] | ASPECTS | 3D-BHCA model |
| [20] | ASPECTS | e-ASPECTS |
| [21] | ASPECTS | EIS-Net |
| **Table 1: Overview of automated stroke scoring methods** (ASPECTS= Alberta Stroke Program Early Computed Tomographic Score, SVM=Support Vector Machine, Collaterals=Collateral Scoring) | | |

### 3. Segmentation Papers

| Citation | Title |
| --- | --- |
| [24] | Identification, Segmentation, and Image Property Study of Acute Infarcts in Diffusion-Weighted Images by Using a Probabilistic Neural Network and Adaptive Gaussian Mixture Model |
| [25] | Computer-Aided Diagnosis Scheme for Detection of Lacunar Infarcts on MR Images |
| [26] | Improvement of automated detection method of lacunar infarcts in brain MR images |
| [27] | Lesion segmentation from multimodal MRI using random forest following ischemic stroke |
| [28] | Automated lesion detection on MRI scans using combined unsupervised and supervised methods |
| [29] | Computer-assisted delineation of cerebral infarct from diffusion-weighted MRI using Gaussian mixture model |
| [30] | Efficient multi-scale 3D CNN with fully connected CRF for accurate brain lesion segmentation |
| [31] | New approach to detect and classify stroke in skull CT images via analysis of brain tissue densities |
| [32] | Segmentation of hyper-acute cerebral infarct based on random forest and sparse coding from diffusion weighted imaging |
| [33] | Delineation of the ischemic stroke lesion based on watershed and relative fuzzy connectedness in brain MRI |
| [34] | Dense Multi-path U-Net for Ischemic Stroke Lesion Segmentation in Multiple Image Modalities |
| [35] | Enhancing interpretability of automatically extracted machine learning features: application to a RBM-Random Forest system on brain lesion segmentation |
| [36] | Ischemic stroke lesion segmentation using stacked sparse autoencoder |
| [37] | ISLES 2016 and 2017-benchmarking ischemic stroke lesion outcome prediction based on multispectral MRI |
| [38] | SEGMENTATION and CLASSIFICATION of ISCHEMIC STROKE USING OPTIMIZED FEATURES in BRAIN MRI |
| [39] | A hybrid approach for sub-acute ischemic stroke lesion segmentation using random decision forest and gravitational search algorithm |
| [40] | Acute ischemic stroke lesion core segmentation in CT perfusion images using fully convolutional neural networks |
| [41] | Big Data Approaches to Phenotyping Acute Ischemic Stroke Using Automated Lesion Segmentation of Multi-Center Magnetic Resonance Imaging Data |
| [42] | Combination of hand-crafted and unsupervised learned features for ischemic stroke lesion detection from Magnetic Resonance Images |
| [43] | Efficient multi-kernel DCNN with pixel dropout for stroke MRI segmentation |
| [44] | Evaluation of enhanced learning techniques for segmenting ischaemic stroke lesions in brain magnetic resonance perfusion images using a convolutional neural network scheme |
| [45] | Semi-automated infarct segmentation from follow-up noncontrast CT scans in patients with acute ischemic stroke |
| [46] | A multi-path 2.5 dimensional convolutional neural network system for segmenting stroke lesions in brain MRI images. |
| [47] | Acute and sub-acute stroke lesion segmentation from multimodal MRI. |
| [48] | Attention convolutional neural network for accurate segmentation and quantification of lesions in ischemic stroke disease |
| [49] | Automated segmentation and classification of brain stroke using expectation-maximization and random forest classifier |
| [50] | Automated segmentation of acute stroke lesions using a data-driven anomaly detection on diffusion weighted MRI |
| [51] | Automatic acute ischemic stroke lesion segmentation using semi-supervised learning |
| [52] | CSNet: A new DeepNet framework for ischemic stroke lesion segmentation |
| [53] | Fully automated segmentation on brain ischemic and white matter hyperintensities lesions using semantic segmentation networks with squeeze-and-excitation blocks in MRI |
| [54] | Improved segmentation and detection sensitivity of diffusion-weighted stroke lesions with synthetically enhanced deep learning |
| [55] | Ischemic stroke lesion detection, characterization and classification in CT images with optimal features selection |
| [56] | Machine Learning for Detecting Early Infarction in Acute Stroke with Non-Contrast-enhanced CT |
| [57] | Deep Learning-Based Acute Ischemic Stroke Lesion Segmentation Method on Multimodal MR Images Using a Few Fully Labeled Subjects |
| [58] | Ischemic Lesion Segmentation using Ensemble of Multi-Scale Region Aligned CNN. |
| [59] | MI-UNet: Multi-Inputs UNet Incorporating Brain Parcellation for Stroke Lesion Segmentation from T1-Weighted Magnetic Resonance Images |
| **Table 2: Overview of papers proposing a lesion segmentation method** | |

### 4. Optimization, validation and outcome measures

Hyperparameter optimization of the proposed model was reported in a minority of studies (17/65, 26%), with the most common method being a grid search in 13 studies (20%). Internal model validation was reported by 61 (94%) papers. Forty (62%) used cross-validation, 10 (15%) used nested cross-validation, of which 7 (11%) reported testing on multiple distinct test sets and 4 (6%) used a leave-one-out approach. Five (8%) papers reported internal validation on a single validation set. External model validation with an independent or hold-out test set was reported by 38 (58%) studies. The remainder that did not report external model validation (27/65, 42%) appear to have reported their model’s results on the validation set. The most common model results were area-under-the-curve (AUC, 54/65, 83%), sensitivity (35/65, 54%), specificity (32/65, 49%), and Dice score (24/65, 37%). Two (3%) papers did not report common model results measurements. Individual results for each study as an overview can be found in Tables 2, 3 and 4. A clinical comparator as a gold standard was reported by 24 (37%) papers with 20 (31%) using an automated comparator or a stroke scoring method and four (6%) using a human rater. The comparator was outperformed by the model in 18/24 cases (75%), 2/24 (8%) reported a worse performance by the model and in 4/24 (17%) there was no AUC or Dice coefficient given to compare the two.

### 5. Full extraction results table

HTML file

Codebook

| **Code** | **Meaning** |
| --- | --- |
| 4D-CTA | Dynamic CT-Perfusion techniques |
| ADC | Apparent diffusion coefficient imaging (MRI) |
| AFib | Atrial fibrillation |
| AIF | Arterial input function |
| ASPECTS | Alberta Stroke Program Early CT Score |
| BP | Blood pressure |
| CBF | Cerebral blood flow (derived from DSC-MRI) |
| CBV | Cerebral blood volume (derived from DSC-MRI) |
| CTA | Computer Tomography-Angiography |
| CTP | Computer Tomography-Perfusion |
| DM | Diabetes mellitus |
| DSA | Digital substraction angiography |
| DSC | Dynamic susceptibility contrast imaging (MRI) |
| DWI | Diffusion weighted imaging (MRI) |
| FLAIR | Fluid-attenuated inversion recovery (MRI) |
| GRE | Gradient echo imaging (MRI) |
| HTN | Hypertension |
| ICH | intracerebral hemorrhage |
| LVO | large vessel occlusion |
| MCA | Middle cerebral artery |
| MRA | magnetic resonance angiography |
| MRI | magnetic resonance imaging |
| mRS | Modified Rankin Scale |
| mTICI | Modified treatment in cerebral ischaemia score |
| MTT | Mean transit time (derived from DSC-MRI) |
| multiphase CTA | Dynamic CT-Perfusion technique with three time-resolved images of pial arterial filling |
| NCCT | Non-contrast Computer Tomography |
| NIHSS | National Institutes of Health Stroke Scale |
| pcASL | pseudocontinuous Arterial Spin Labeling (MRI) |
| PWI | Perfusion-weighte imaging (MRI) incl. DSC/ASL/DCE |
| r-tPA | recombinant tissue plasminogen activator |
| rCBF/rCBV | regional cerebral blood flow/volume (MRI) |
| ROI | region of interest |
| T1 | T1-weighted imaging (MRI) |
| T1c | contrast enhanced T1-weighted imaging (MRI) |
| T2 | T2-weighted imaging (MRI) |
| T2DM | Type 2 Diabetes mellitus |
| TIA | Transient ischemic attack |
| Tmax | Time to maximum (derived from CTP/PWI) |
| tPA | Tissue Plasminogen Activator |
| TTP | Time to peak (derived from DSC-MRI) |

# References

[1] Y. Shieh *et al.*, “Computer-Aided Diagnosis of Hyperacute Stroke with Thrombolysis Decision Support Using a Contralateral Comparative Method of CT Image Analysis,” *J. Digit. Imaging*, vol. 27, no. 3, pp. 392–406, Jun. 2014, doi: 10.1007/s10278-013-9672-x.

[2] S. Nagel *et al.*, “e-ASPECTS software is non-inferior to neuroradiologists in applying the ASPECT score to computed tomography scans of acute ischemic stroke patients,” *Int. J. Stroke*, vol. 12, no. 6, pp. 615–622, Aug. 2017, doi: 10.1177/1747493016681020.

[3] C. Herweh *et al.*, “Performance of e-ASPECTS software in comparison to that of stroke physicians on assessing CT scans of acute ischemic stroke patients,” *Int. J. Stroke*, vol. 11, no. 4, pp. 438–445, Jun. 2016, doi: 10.1177/1747493016632244.

[4] J. Goebel *et al.*, “Automated ASPECT rating: comparison between the Frontier ASPECT Score software and the Brainomix software,” *Neuroradiology*, vol. 60, no. 12, pp. 1267–1272, Dec. 2018, doi: 10.1007/s00234-018-2098-x.

[5] S. Nagel *et al.*, “Clinical Utility of Electronic Alberta Stroke Program Early Computed Tomography Score Software in the ENCHANTED Trial Database,” *Stroke*, vol. 49, no. 6, pp. 1407–1411, Jun. 2018, doi: 10.1161/STROKEAHA.117.019863.

[6] J. Goebel *et al.*, “Computer aided diagnosis for ASPECT rating: initial experiences with the Frontier ASPECT Score software,” Apr. 2019, doi: 10.1177/0284185119842465.

[7] N. Guberina *et al.*, “Detection of early infarction signs with machine learning-based diagnosis by means of the Alberta Stroke Program Early CT score (ASPECTS) in the clinical routine,” *Neuroradiology*, vol. 60, no. 9, pp. 889–901, Sep. 2018, doi: 10.1007/s00234-018-2066-5.

[8] H. Kuang *et al.*, “Automated ASPECTS on Noncontrast CT Scans in Patients with Acute Ischemic Stroke Using Machine Learning,” *Am. J. Neuroradiol.*, vol. 40, no. 1, pp. 33–38, Jan. 2019, doi: 10.3174/ajnr.A5889.

[9] G. W. Albers *et al.*, “Automated Calculation of Alberta Stroke Program Early CT Score: Validation in Patients With Large Hemispheric Infarct,” *Stroke*, vol. 50, no. 11, pp. 3277–3279, Nov. 2019, doi: 10.1161/STROKEAHA.119.026430.

[10] F. Austein *et al.*, “Automated versus manual imaging assessment of early ischemic changes in acute stroke: comparison of two software packages and expert consensus,” *Eur. Radiol.*, vol. 29, no. 11, pp. 6285–6292, Nov. 2019, doi: 10.1007/s00330-019-06252-2.

[11] I. Q. Grunwald *et al.*, “Collateral Automation for Triage in Stroke: Evaluating Automated Scoring of Collaterals in Acute Stroke on Computed Tomography Scans,” *Cerebrovasc. Dis.*, vol. 47, no. 5–6, pp. 217–222, 2019, doi: 10.1159/000500076.

[12] S. Nagel *et al.*, “e-ASPECTS derived acute ischemic volumes on non-contrast-enhanced computed tomography images,” *Int. J. Stroke Off. J. Int. Stroke Soc.*, vol. 15, no. 9, pp. 995–1001, Dec. 2020, doi: 10.1177/1747493019879661.

[13] L.-N. Do, B. H. Baek, S. K. Kim, H.-J. Yang, I. Park, and W. Yoon, “Automatic Assessment of ASPECTS Using Diffusion-Weighted Imaging in Acute Ischemic Stroke Using Recurrent Residual Convolutional Neural Network,” *Diagnostics*, vol. 10, no. 10, p. 803, Oct. 2020, doi: 10.3390/diagnostics10100803.

[14] J. Su *et al.*, “Automatic Collateral Scoring From 3D CTA Images,” *IEEE Trans. Med. Imaging*, vol. 39, no. 6, pp. 2190–2200, Jun. 2020, doi: 10.1109/TMI.2020.2966921.

[15] X. Cheng *et al.*, “Comparison of automated and manual DWI-ASPECTS in acute ischemic stroke: total and region-specific assessment,” *Eur. Radiol.*, vol. 31, no. 6, pp. 4130–4137, Jun. 2021, doi: 10.1007/s00330-020-07493-2.

[16] M. Olive-Gadea *et al.*, “Deep Learning Based Software to Identify Large Vessel Occlusion on Noncontrast Computed Tomography,” *Stroke*, vol. 51, no. 10, pp. 3133–3137, Oct. 2020, doi: 10.1161/STROKEAHA.120.030326.

[17] M. Ernst *et al.*, “Effect of CAD on performance in ASPECTS reading,” *Inform. Med. Unlocked*, vol. 18, p. 100295, 2020, doi: 10.1016/j.imu.2020.100295.

[18] A. Neuhaus *et al.*, “Region-specific agreement in ASPECTS estimation between neuroradiologists and e-ASPECTS software,” *J. NeuroInterventional Surg.*, vol. 12, no. 7, pp. 720–723, Jul. 2020, doi: 10.1136/neurintsurg-2019-015442.

[19] M. Naganuma *et al.*, “Alberta Stroke Program Early CT Score Calculation Using the Deep Learning-Based Brain Hemisphere Comparison Algorithm,” *J. Stroke Cerebrovasc. Dis. Off. J. Natl. Stroke Assoc.*, vol. 30, no. 7, p. 105791, Jul. 2021, doi: 10.1016/j.jstrokecerebrovasdis.2021.105791.

[20] W. Brinjikji *et al.*, “e-ASPECTS software improves interobserver agreement and accuracy of interpretation of aspects score,” *Interv. Neuroradiol.*, vol. 27, no. 6, pp. 781–787, Dec. 2021, doi: 10.1177/15910199211011861.

[21] H. Kuang, B. K. Menon, S. I. Sohn, and W. Qiu, “EIS-Net: Segmenting early infarct and scoring ASPECTS simultaneously on non-contrast CT of patients with acute ischemic stroke,” *Med. Image Anal.*, vol. 70, p. 101984, May 2021, doi: 10.1016/j.media.2021.101984.

[22] A. Yahav-Dovrat *et al.*, “Evaluation of Artificial Intelligence-Powered Identification of Large-Vessel Occlusions in a Comprehensive Stroke Center,” *AJNR Am. J. Neuroradiol.*, vol. 42, no. 2, pp. 247–254, Jan. 2021, doi: 10.3174/ajnr.A6923.

[23] R. A. Rava *et al.*, “Validation of an artificial intelligence-driven large vessel occlusion detection algorithm for acute ischemic stroke patients,” *Neuroradiol. J.*, vol. 34, no. 5, pp. 408–417, Oct. 2021, doi: 10.1177/1971400921998952.

[24] K. Bhanu Prakash, V. Gupta, M. Bilello, N. J. Beauchamp, and W. L. Nowinski, “Identification, Segmentation, and Image Property Study of Acute Infarcts in Diffusion-Weighted Images by Using a Probabilistic Neural Network and Adaptive Gaussian Mixture Model,” *Acad. Radiol.*, vol. 13, no. 12, pp. 1474–1484, Dec. 2006, doi: 10.1016/j.acra.2006.09.045.

[25] Y. Uchiyama *et al.*, “Computer-Aided Diagnosis Scheme for Detection of Lacunar Infarcts on MR Images,” *Acad. Radiol.*, vol. 14, no. 12, pp. 1554–1561, Dec. 2007, doi: 10.1016/j.acra.2007.09.012.

[26] Y. Uchiyama *et al.*, “Improvement of automated detection method of lacunar infarcts in brain MR images,” *Annu. Int. Conf. IEEE Eng. Med. Biol. Soc. IEEE Eng. Med. Biol. Soc. Annu. Int. Conf.*, vol. 2007, pp. 1599–1602, 2007, doi: 10.1109/IEMBS.2007.4352611.

[27] J. Mitra *et al.*, “Lesion segmentation from multimodal MRI using random forest following ischemic stroke,” *NeuroImage*, vol. 98, pp. 324–335, Sep. 2014, doi: 10.1016/j.neuroimage.2014.04.056.

[28] D. Guo *et al.*, “Automated lesion detection on MRI scans using combined unsupervised and supervised methods,” *BMC Med. Imaging*, vol. 15, no. 1, p. 50, Oct. 2015, doi: 10.1186/s12880-015-0092-x.

[29] M. K. Nag *et al.*, “Computer-assisted delineation of cerebral infarct from diffusion-weighted MRI using Gaussian mixture model,” *Int. J. Comput. Assist. Radiol. Surg.*, vol. 12, no. 4, pp. 539–552, Apr. 2017, doi: 10.1007/s11548-017-1520-x.

[30] K. Kamnitsas *et al.*, “Efficient Multi-Scale 3D CNN with Fully Connected CRF for Accurate Brain Lesion Segmentation,” *Med. Image Anal.*, vol. 36, pp. 61–78, Feb. 2017, doi: 10.1016/j.media.2016.10.004.

[31] P. P. Rebouças Filho, R. M. Sarmento, G. B. Holanda, and D. de Alencar Lima, “New approach to detect and classify stroke in skull CT images via analysis of brain tissue densities,” *Comput. Methods Programs Biomed.*, vol. 148, pp. 27–43, Sep. 2017, doi: 10.1016/j.cmpb.2017.06.011.

[32] null Xiaodong Zhang, A. Elazab, and null Qingmao Hu, “Segmentation of hyper-acute cerebral infarct based on random forest and sparse coding from diffusion weighted imaging,” *Annu. Int. Conf. IEEE Eng. Med. Biol. Soc. IEEE Eng. Med. Biol. Soc. Annu. Int. Conf.*, vol. 2017, pp. 3425–3428, Jul. 2017, doi: 10.1109/EMBC.2017.8037592.

[33] A. Subudhi, S. Jena, and S. Sabut, “Delineation of the ischemic stroke lesion based on watershed and relative fuzzy connectedness in brain MRI,” *Med. Biol. Eng. Comput.*, vol. 56, no. 5, pp. 795–807, May 2018, doi: 10.1007/s11517-017-1726-7.

[34] J. Dolz, I. B. Ayed, and C. Desrosiers, “Dense Multi-path U-Net for Ischemic Stroke Lesion Segmentation in Multiple Image Modalities,” *ArXiv181007003 Cs*, Oct. 2018, Accessed: Jul. 16, 2021. [Online]. Available: http://arxiv.org/abs/1810.07003

[35] S. Pereira *et al.*, “Enhancing interpretability of automatically extracted machine learning features: application to a RBM-Random Forest system on brain lesion segmentation,” *Med. Image Anal.*, vol. 44, pp. 228–244, Feb. 2018, doi: 10.1016/j.media.2017.12.009.

[36] G. B. Praveen, A. Agrawal, P. Sundaram, and S. Sardesai, “Ischemic stroke lesion segmentation using stacked sparse autoencoder,” *Comput. Biol. Med.*, vol. 99, pp. 38–52, Aug. 2018, doi: 10.1016/j.compbiomed.2018.05.027.

[37] S. Winzeck *et al.*, “ISLES 2016 and 2017-Benchmarking Ischemic Stroke Lesion Outcome Prediction Based on Multispectral MRI,” *Front. Neurol.*, vol. 9, p. 679, Sep. 2018, doi: 10.3389/fneur.2018.00679.

[38] A. Subudhi, S. Sahoo, P. Biswal, and S. Sabut, “SEGMENTATION AND CLASSIFICATION OF ISCHEMIC STROKE USING OPTIMIZED FEATURES IN BRAIN MRI,” *Biomed. Eng. Appl. Basis Commun.*, vol. 30, no. 03, p. 1850011, Jun. 2018, doi: 10.4015/S1016237218500114.

[39] S. B. Melingi and V. Vijayalakshmi, “A Hybrid Approach for Sub-Acute Ischemic Stroke Lesion Segmentation Using Random Decision Forest and Gravitational Search Algorithm,” *Curr. Med. Imaging Rev.*, vol. 15, no. 2, pp. 170–183, 2019, doi: 10.2174/1573405614666180209150338.

[40] A. Clèrigues, S. Valverde, J. Bernal, J. Freixenet, A. Oliver, and X. Lladó, “Acute ischemic stroke lesion core segmentation in CT perfusion images using fully convolutional neural networks,” *Comput. Biol. Med.*, vol. 115, p. 103487, Dec. 2019, doi: 10.1016/j.compbiomed.2019.103487.

[41] O. Wu *et al.*, “Big Data Approaches to Phenotyping Acute Ischemic Stroke Using Automated Lesion Segmentation of Multi-Center Magnetic Resonance Imaging Data,” *Stroke*, vol. 50, no. 7, pp. 1734–1741, Jul. 2019, doi: 10.1161/STROKEAHA.119.025373.

[42] P. Gurunath Bharathi, A. Agrawal, P. Sundaram, and S. Sardesai, “Combination of hand-crafted and unsupervised learned features for ischemic stroke lesion detection from Magnetic Resonance Images,” *Biocybern. Biomed. Eng.*, vol. 39, no. 2, pp. 410–425, Apr. 2019, doi: 10.1016/j.bbe.2019.01.003.

[43] L. Liu, F.-X. Wu, and J. Wang, “Efficient multi-kernel DCNN with pixel dropout for stroke MRI segmentation,” *Neurocomputing*, vol. 350, pp. 117–127, Jul. 2019, doi: 10.1016/j.neucom.2019.03.049.

[44] C. U. Pérez Malla, M. del C. Valdés Hernández, M. F. Rachmadi, and T. Komura, “Evaluation of Enhanced Learning Techniques for Segmenting Ischaemic Stroke Lesions in Brain Magnetic Resonance Perfusion Images Using a Convolutional Neural Network Scheme,” *Front. Neuroinformatics*, vol. 13, p. 33, May 2019, doi: 10.3389/fninf.2019.00033.

[45] H. Kuang, B. K. Menon, and W. Qiu, “Semi-automated infarct segmentation from follow-up noncontrast CT scans in patients with acute ischemic stroke,” *Med. Phys.*, vol. 46, no. 9, pp. 4037–4045, Sep. 2019, doi: 10.1002/mp.13703.

[46] Y. Xue *et al.*, “A multi-path 2.5 dimensional convolutional neural network system for segmenting stroke lesions in brain MRI images,” *NeuroImage Clin.*, vol. 25, p. 102118, 2020, doi: 10.1016/j.nicl.2019.102118.

[47] A. Clèrigues, S. Valverde, J. Bernal, J. Freixenet, A. Oliver, and X. Lladó, “Acute and sub-acute stroke lesion segmentation from multimodal MRI,” *Comput. Methods Programs Biomed.*, vol. 194, p. 105521, Oct. 2020, doi: 10.1016/j.cmpb.2020.105521.

[48] L. Liu, L. Kurgan, F.-X. Wu, and J. Wang, “Attention convolutional neural network for accurate segmentation and quantification of lesions in ischemic stroke disease,” *Med. Image Anal.*, vol. 65, p. 101791, Oct. 2020, doi: 10.1016/j.media.2020.101791.

[49] A. Subudhi, M. Dash, and S. Sabut, “Automated segmentation and classification of brain stroke using expectation-maximization and random forest classifier,” *Biocybern. Biomed. Eng.*, vol. 40, no. 1, pp. 277–289, Jan. 2020, doi: 10.1016/j.bbe.2019.04.004.

[50] S. Nazari-Farsani, M. Nyman, T. Karjalainen, M. Bucci, J. Isojärvi, and L. Nummenmaa, “Automated segmentation of acute stroke lesions using a data-driven anomaly detection on diffusion weighted MRI,” *J. Neurosci. Methods*, vol. 333, p. 108575, Mar. 2020, doi: 10.1016/j.jneumeth.2019.108575.

[51] B. Zhao *et al.*, “Automatic Acute Ischemic Stroke Lesion Segmentation Using Semi-supervised Learning:,” *Int. J. Comput. Intell. Syst.*, vol. 14, no. 1, p. 723, 2021, doi: 10.2991/ijcis.d.210205.001.

[52] A. Kumar *et al.*, “CSNet: A new DeepNet framework for ischemic stroke lesion segmentation,” *Comput. Methods Programs Biomed.*, vol. 193, p. 105524, Sep. 2020, doi: 10.1016/j.cmpb.2020.105524.

[53] A.-R. Lee, I. Woo, D.-W. Kang, S. C. Jung, H. Lee, and N. Kim, “Fully automated segmentation on brain ischemic and white matter hyperintensities lesions using semantic segmentation networks with squeeze-and-excitation blocks in MRI,” *Inform. Med. Unlocked*, vol. 21, p. 100440, Jan. 2020, doi: 10.1016/j.imu.2020.100440.

[54] C. Federau *et al.*, “Improved Segmentation and Detection Sensitivity of Diffusion-weighted Stroke Lesions with Synthetically Enhanced Deep Learning,” *Radiol. Artif. Intell.*, vol. 2, no. 5, p. e190217, Sep. 2020, doi: 10.1148/ryai.2020190217.

[55] R. Kanchana and R. Menaka, “Ischemic stroke lesion detection, characterization and classification in CT images with optimal features selection,” *Biomed. Eng. Lett.*, vol. 10, no. 3, pp. 333–344, Aug. 2020, doi: 10.1007/s13534-020-00158-5.

[56] W. Qiu *et al.*, “Machine Learning for Detecting Early Infarction in Acute Stroke with                    Non–Contrast-enhanced CT,” *Radiology*, vol. 294, no. 3, pp. 638–644, Jan. 2020, doi: 10.1148/radiol.2020191193.

[57] B. Zhao *et al.*, “Deep Learning-Based Acute Ischemic Stroke Lesion Segmentation Method on Multimodal MR Images Using a Few Fully Labeled Subjects,” *Comput. Math. Methods Med.*, vol. 2021, pp. 1–13, Jan. 2021, doi: 10.1155/2021/3628179.

[58] R. Karthik, R. Menaka, M. Hariharan, and D. Won, “Ischemic Lesion Segmentation using Ensemble of Multi-Scale Region Aligned CNN,” *Comput. Methods Programs Biomed.*, vol. 200, p. 105831, Mar. 2021, doi: 10.1016/j.cmpb.2020.105831.

[59] Y. Zhang, J. Wu, Y. Liu, Y. Chen, E. X. Wu, and X. Tang, “MI-UNet: Multi-Inputs UNet Incorporating Brain Parcellation for Stroke Lesion Segmentation From T1-Weighted Magnetic Resonance Images,” *IEEE J. Biomed. Health Inform.*, vol. 25, no. 2, pp. 526–535, Feb. 2021, doi: 10.1109/JBHI.2020.2996783.
